# Supplementary material for: A unique arsenic speciation profile in Elaphomyces spp. (“deer truffles”)—trimethylarsine oxide and methylarsonous acid as significant arsenic compounds
Source: PubMed Central journal article supplement (PMC5849658; doi:10.1007/s00216-018-0903-3), 2018-02-12
Supplement: 216_2018_903_MOESM1_ESM.pdf [file 216_2018_903_MOESM1_ESM.pdf]

## **Analytical and Bioanalytical Chemistry**

### **Electronic Supplementary Material**

#### **A unique arsenic speciation profile in *Elaphomyces* spp. (“deer truffles”) – trimethylarsine oxide and methylarsonous acid as significant arsenic compounds**

Simone Braeuer, Jan Borovička, Walter Goessler

Additional files available under [10.1007/s00216-018-0903-3](https://doi.org/10.1007/s00216-018-0903-3).

**Table S1** All measured elements with the elected octopole gas modes and m/z ratios

| Element Name | octopole gas mode | m/z      |
|--------------|-------------------|----------|
| Li           | nogas             | 7        |
| B            | nogas             | 11       |
| Na           | He                | 23       |
| Mg           | He                | 24       |
| Al           | nogas             | 27       |
| P            | O2                | 31 -> 47 |
| S            | O2                | 32 -> 48 |
| K            | He                | 39       |
| Ca           | He                | 43       |
| V            | He                | 51       |
| Cr           | He                | 52       |
| Mn           | He                | 55       |
| Fe           | He                | 56       |
| Co           | He                | 59       |
| Ni           | He                | 60       |
| Cu           | He                | 65       |
| Zn           | He                | 66       |
| As           | O2                | 75 -> 91 |
| Se           | H2                | 78       |
| Rb           | He                | 85       |
| Sr           | He                | 88       |
| Mo           | nogas             | 98       |
| Ag           | nogas             | 107      |
| Cd           | nogas             | 111      |
| Sn           | nogas             | 118      |
| Sb           | nogas             | 121      |
| Te           | nogas             | 125      |
| Cs           | he                | 133      |
| Ba           | nogas             | 137      |
| Gd           | nogas             | 157      |
| Hg           | nogas             | 201      |
| Tl           | nogas             | 205      |
| Pb           | nogas             | 208      |
| Bi           | nogas             | 209      |
| U            | nogas             | 238      |

**Table S2** Configuration of ICPQQMS. Differing settings during HPLC-ICPMS in O<sub>2</sub>-mode in brackets

|                           | O2         | H2          | He          | nogas       |
|---------------------------|------------|-------------|-------------|-------------|
| Scan Type                 | MS/MS      | Single Quad | Single Quad | Single Quad |
| RF Power [W]              | 1600       | 1600        | 1600        | 1600        |
| RF Matching [V]           | 1.8        | 1.8         | 1.8         | 1.8         |
| Smpl Depth [mm]           | 8          | 8           | 8           | 8           |
| Carrier Gas [L/min]       | 1.1 (0.85) | 1.1         | 1.1         | 1.1         |
| Option Gas [%]            | 0 (15)     | 0           | 0           | 0           |
| Nebulizer Pump [rps]      | 0.1 (0.5)  | 0.1         | 0.1         | 0.1         |
| S/C Temp [°C]             | 2          | 2           | 2           | 2           |
| Extract 1 [V]             | 0          | 0           | -1.5        | -1.5        |
| Extract 2 [V]             | -160       | -150        | -195        | -185        |
| Omega Bias [V]            | -90        | -80         | -110        | -95         |
| Omega Lens [V]            | 6.6        | 6.6         | 7.9         | 7.9         |
| Q1 Entrance [V]           | -1         | -1          | -3          | 0           |
| Q1 Exit [V]               | -1         | -1          | -1          | -1          |
| Cell Focus [V]            | 2          | -4          | -3          | -6          |
| Cell Entrance [V]         | -50        | -50         | -50         | -50         |
| Cell Exit [V]             | -60        | -60         | -60         | -60         |
| Deflect [V]               | 3.2        | -60         | -6          | 13          |
| Plate Bias [V]            | -60        | -60         | -60         | -60         |
| Q1 Bias [V]               | -2         | -4          | -4          | -3          |
| Q1 Prefilter Bias [V]     | -44        | -36         | -48         | -40         |
| Q1 Postfilter Bias [V]    | -18        | -18         | -34         | -2          |
| He flow [mL/min]          | 0          | 0           | 4           | 0           |
| H2 flow [mL/min]          | 0          | 5.5         | 0           | 0           |
| 4th cell gas flow [%]     | 25         | 0           | 0           | 0           |
| OcP Bias [V]              | -5         | -18         | -18         | -8          |
| OcP RF [V]                | 190        | 200         | 130         | 120         |
| Energy discrimination [V] | -7         | 0           | 3           | 5           |

**Table S3** and **Table S4** available under „Supplementary material“

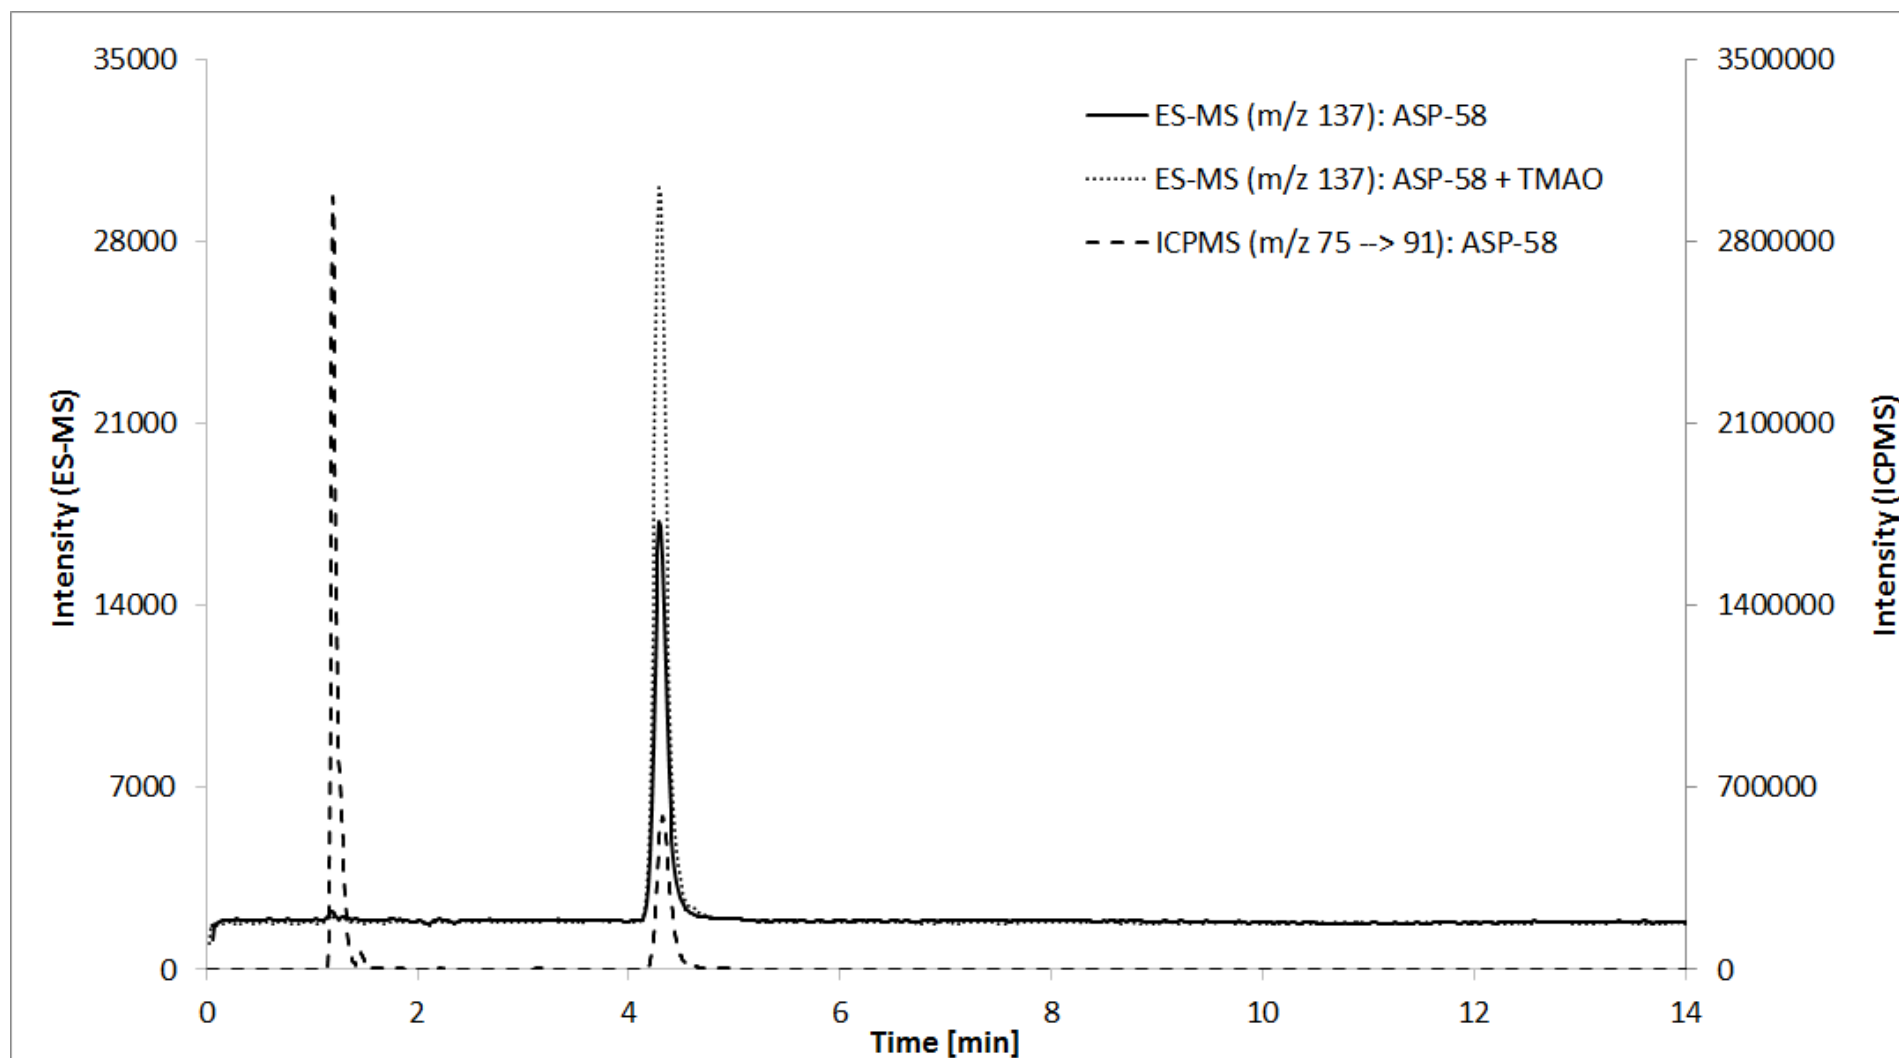

**Fig. S1** HPLC-ES-MS chromatograms of  $m/z$  137 ( $(\text{CH}_3)_3\text{AsOH}^+$ ). Solid line = extract of ASP-058, diluted 1+9 with water. Dotted line = same sample as for the solid line, spiked with a pure solution of TMAO ( $200 \mu\text{g As L}^{-1}$ ). Dashed line = same sample and chromatographic method as for the solid line, but with ICPMS (ICPQQMS 8800, oxygen mode,  $m/z$  75  $\rightarrow$  91) as detector instead of ES-MS
